# Supplementary material
Source: PubMed Central journal article supplement (PMC9066276)
Supplement: NIHMS1798258-supplement-1.pdf [file NIHMS1798258-supplement-1.pdf]

# Supplemental Materials

## S1. Hood Perception Survey (Hollies et al., 1919)

**Subject ID:** \_\_\_\_\_ **Hood Perception Survey (Circle one):**

Select the one best response for each item as it relates to the **Hood** you are wearing.

1. Overall Comfort of Hood  
(7) very comfortable (3) slightly uncomfortable  
(6) comfortable (2) uncomfortable  
(5) slightly comfortable (1) very uncomfortable  
(4) neither comfortable nor uncomfortable
  
2. Thermal Feeling of Hood  
(7) very cool (3) slightly warm  
(6) cool (2) warm  
(5) slightly cool (1) very warm  
(4) neutral
  
3. Moistness of Hood  
(7) totally dry (3) some dripping  
(6) slight feeling of moistness on neck/ head (2) heavy dripping  
(5) breaking a sweat (1) sweat running off the body  
(4) most of neck and head feel wet

Rate the degree to which you sense each negative hood quality:

| <b>Property</b>          | <b>Totally</b> | <b>Mostly</b> | <b>Mildly</b> | <b>Slightly</b> | <b>None</b> |
|--------------------------|----------------|---------------|---------------|-----------------|-------------|
| 4. Tight                 | (1)            | (2)           | (3)           | (4)             | (5)         |
| 5. Hearing reduction     | (1)            | (2)           | (3)           | (4)             | (5)         |
| 6. Heavy/Thick           | (1)            | (2)           | (3)           | (4)             | (5)         |
| 7. Stiff                 | (1)            | (2)           | (3)           | (4)             | (5)         |
| 8. Hot                   | (1)            | (2)           | (3)           | (4)             | (5)         |
| 9. Nonbreathable         | (1)            | (2)           | (3)           | (4)             | (5)         |
| 10. Damp                 | (1)            | (2)           | (3)           | (4)             | (5)         |
| 11. Noisy                | (1)            | (2)           | (3)           | (4)             | (5)         |
| 12. Movement Restriction | (1)            | (2)           | (3)           | (4)             | (5)         |
| 13. Nonstretchy          | (1)            | (2)           | (3)           | (4)             | (5)         |

Add voluntary comments:
